# Supplementary material
Source: PubMed Central journal article supplement (PMC8630642)
Supplement: jamainternmed-e216437-s001.pdf [file jamainternmed-e216437-s001.pdf]

## Supplemental Online Content

Seib CD, Meng T, Suh I, et al. Risk of fracture among older adults with primary hyperparathyroidism receiving parathyroidectomy vs nonoperative management. *JAMA Intern Med*. Published online November 29, 2021. doi:10.1001/jamainternmed.2021.6437

**eFigure 1.** Cohort enrollment criteria

**eTable 1.** Adjusted hazard of any fracture and hip fracture based on inverse-probability weighted Fine-Gray competing risk regression accounting for the competing risk of death among Medicare beneficiaries with PHPT.

**eTable 2.** Baseline characteristics of subgroup of older adults diagnosed with PHPT from 2006 – 2017 who have continuous enrollment in Medicare Part D (prescription) coverage for 12 months prior to diagnosis.

**eTable 3.** Unadjusted incidence rate and adjusted hazard of any fracture and hip fracture based on inverse-probability weighted Cox proportional hazard regression among subgroup of Medicare beneficiaries with PHPT who have continuous enrollment in Medicare Part D (prescription) coverage for 12 months prior to diagnosis.

This supplemental material has been provided by the authors to give readers additional information about their work.

eFigure 1. Cohort Enrollment Criteria

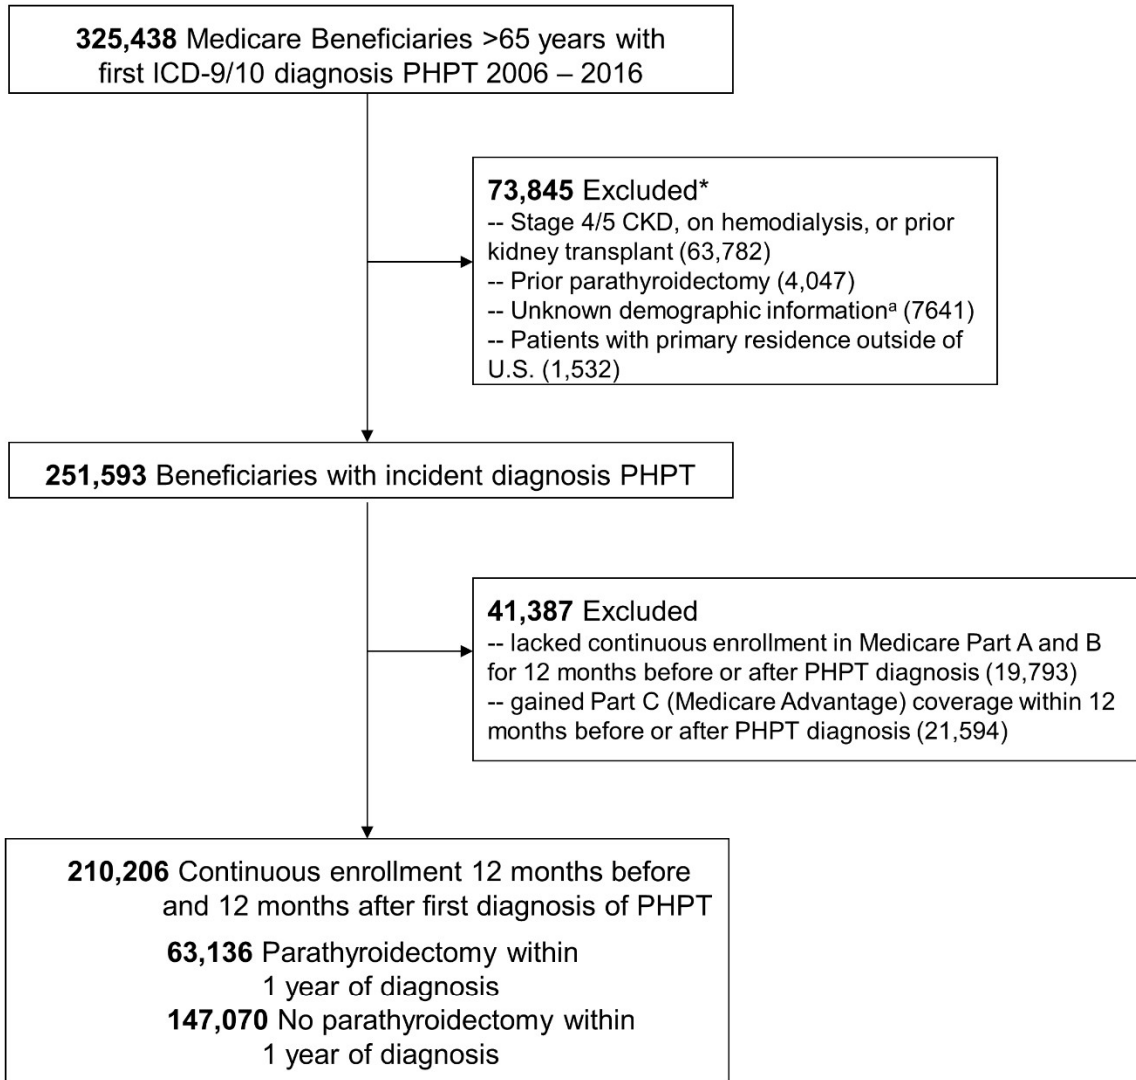

\* The sum of subcategory totals exceeds the number of total exclusions because some patients met multiple exclusion criteria

<sup>a</sup> Patients were excluded if unknown age, sex, race/ethnicity, area deprivation index, or urban/rural inhabitation.

eTable 1. Adjusted hazard of any fracture and hip fracture based on inverse-probability weighted Fine-Gray competing risk regression accounting for the competing risk of death among Medicare beneficiaries with PHPT.

|                          | Any Fracture                        |        |      | Hip Fracture                        |        |      |
|--------------------------|-------------------------------------|--------|------|-------------------------------------|--------|------|
|                          | Fine-Gray Competing Risk Regression |        |      | Fine-Gray Competing Risk Regression |        |      |
| Characteristic           | IPW Adjusted HR                     | 95% CI |      | IPW Adjusted HR                     | 95% CI |      |
| <b>Treatment</b>         |                                     |        |      |                                     |        |      |
| Non-operative management | Ref                                 | --     | --   | Ref                                 | --     | --   |
| Parathyroidectomy        | 0.84                                | 0.82   | 0.85 | 0.83                                | 0.80   | 0.85 |
| <b>Sex</b>               |                                     |        |      |                                     |        |      |
| Male                     | Ref                                 | --     | --   | Ref                                 | --     | --   |
| Female                   | 1.49                                | 1.45   | 1.54 | 1.37                                | 1.30   | 1.44 |
| <b>Age group</b>         |                                     |        |      |                                     |        |      |
| 66 to 75                 | Ref                                 | --     | --   | Ref                                 | --     | --   |
| 76 to 85                 | 1.55                                | 1.52   | 1.58 | 2.16                                | 2.08   | 2.24 |
| 86 and above             | 1.85                                | 1.80   | 1.91 | 3.01                                | 2.86   | 3.16 |
| <b>Race</b>              |                                     |        |      |                                     |        |      |
| White                    | Ref                                 | --     | --   | Ref                                 | --     | --   |
| Black                    | 0.44                                | 0.42   | 0.46 | 0.42                                | 0.39   | 0.46 |
| Asian                    | 0.73                                | 0.66   | 0.81 | 0.77                                | 0.64   | 0.92 |
| Hispanic                 | 0.93                                | 0.86   | 1.01 | 0.83                                | 0.71   | 0.97 |
| American Native          | 0.98                                | 0.82   | 1.18 | 0.78                                | 0.54   | 1.12 |
| Unknown                  | 0.63                                | 0.56   | 0.70 | 0.54                                | 0.44   | 0.68 |
| <b>ADI Group</b>         |                                     |        |      |                                     |        |      |
| Most advantaged          | Ref                                 | --     | --   | Ref                                 | --     | --   |

|                                                          |      |      |      |      |      |      |
|----------------------------------------------------------|------|------|------|------|------|------|
| Slightly advantaged                                      | 1.01 | 0.99 | 1.04 | 1.07 | 1.02 | 1.11 |
| Slightly disadvantaged                                   | 1.01 | 0.98 | 1.04 | 1.10 | 1.05 | 1.15 |
| Most disadvantaged                                       | 1.04 | 1.01 | 1.08 | 1.22 | 1.15 | 1.30 |
| <b>Geography</b>                                         |      |      |      |      |      |      |
| Urban                                                    | Ref  | --   | --   | Ref  | --   | --   |
| Rural                                                    | 1.02 | 1.00 | 1.53 | 1.05 | 0.99 | 1.08 |
| <b>Frailty</b>                                           |      |      |      |      |      |      |
| Robust                                                   | Ref  | --   | --   | Ref  | --   | --   |
| Prefrail                                                 | 1.34 | 1.31 | 1.37 | 1.22 | 1.17 | 1.27 |
| Mildly frail                                             | 1.65 | 1.60 | 1.71 | 1.53 | 1.44 | 1.62 |
| Moderately-to-severely frail                             | 1.42 | 1.36 | 1.49 | 1.39 | 1.29 | 1.50 |
| <b>Charlson Comorbidity Index Score</b>                  |      |      |      |      |      |      |
| 0                                                        | Ref  | --   | --   | Ref  | --   | --   |
| 1                                                        | 1.08 | 1.05 | 1.11 | 1.05 | 1.00 | 1.10 |
| ≥2                                                       | 1.09 | 1.07 | 1.12 | 1.04 | 0.99 | 1.09 |
| <b>Operative indications for parathyroidectomy</b>       |      |      |      |      |      |      |
| History of osteoporosis                                  | 1.67 | 1.64 | 1.71 | 1.41 | 1.36 | 1.46 |
| History of kidney stones                                 | 0.96 | 0.93 | 0.98 | 0.92 | 0.88 | 0.97 |
| History of stage 3 CKD                                   | 0.88 | 0.85 | 0.91 | 1.01 | 0.96 | 1.07 |
| <b>Endocrinologist care within 6 months of diagnosis</b> | 0.98 | 0.96 | 1.00 | 0.93 | 0.90 | 0.96 |
| <b>Fracture Risk Factors</b>                             |      |      |      |      |      |      |
| Prior fracture                                           | 2.20 | 2.15 | 2.25 | 1.47 | 1.41 | 1.54 |
| Tobacco use                                              | 1.27 | 1.22 | 1.33 | 1.59 | 1.48 | 1.70 |
| Alcohol use disorder                                     | 1.44 | 1.32 | 1.57 | 1.44 | 1.23 | 1.69 |
| Obesity                                                  | 0.93 | 0.90 | 0.96 | 0.75 | 0.70 | 0.80 |

\* The propensity score used for inverse probability weighting (IPW) in this table was based on all characteristics listed in this table. Abbreviations: IPW, inverse probability weighted; ADI, area deprivation index; CKD, chronic kidney disease.

eTable 2. Baseline characteristics of subgroup of older adults diagnosed with PHPT from 2006 – 2017 who have continuous enrollment in Medicare Part D (prescription) coverage for 12 months prior to diagnosis.

|                        | Unadjusted                 |       |                              |       |                                     |       |        | IPW-adjusted <sup>a</sup>  |                              |                                     |        |  |
|------------------------|----------------------------|-------|------------------------------|-------|-------------------------------------|-------|--------|----------------------------|------------------------------|-------------------------------------|--------|--|
|                        | Overall cohort (n=210,206) |       | Parathyroidectomy (n=63,136) |       | Non-operatively managed (n=147,070) |       | SMD    | Overall cohort (n=210,206) | Parathyroidectomy (n=63,136) | Non-operatively managed (n=147,070) | SMD    |  |
| Characteristic         | No.                        | %     | No.                          | %     | No.                                 | %     | SMD    | %                          | %                            | %                                   | SMD    |  |
| <b>Sex</b>             |                            |       |                              |       |                                     |       |        |                            |                              |                                     |        |  |
| Female                 | 89,489                     | 80.9% | 25,917                       | 80.6% | 63,572                              | 81.1% | 0.013  | 81.1%                      | 81.4%                        | 81.0%                               | -0.008 |  |
| Male                   | 21,063                     | 19.1% | 6,246                        | 19.4% | 14,817                              | 18.9% | -0.013 | 18.9%                      | 18.6%                        | 19.0%                               | 0.008  |  |
| <b>Age group</b>       |                            |       |                              |       |                                     |       |        |                            |                              |                                     |        |  |
| 66 to 75               | 62,744                     | 56.8% | 21,740                       | 67.6% | 41,004                              | 52.3% | -0.316 | 56.6%                      | 56.5%                        | 56.7%                               | 0.004  |  |
| 76 to 85               | 37,788                     | 34.2% | 9,396                        | 29.2% | 28,392                              | 36.2% | 0.150  | 34.4%                      | 34.6%                        | 34.2%                               | -0.008 |  |
| 86 and above           | 10,020                     | 9.1%  | 1,027                        | 3.2%  | 8,993                               | 11.5% | 0.322  | 9.0%                       | 8.9%                         | 9.1%                                | 0.006  |  |
| <b>Race</b>            |                            |       |                              |       |                                     |       |        |                            |                              |                                     |        |  |
| White                  | 95,761                     | 86.6% | 28,998                       | 90.2% | 66,763                              | 85.2% | -0.152 | 86.6%                      | 86.5%                        | 86.6%                               | 0.003  |  |
| Black                  | 10,012                     | 9.1%  | 2,225                        | 6.9%  | 7,787                               | 9.9%  | 0.109  | 9.1%                       | 9.2%                         | 9.1%                                | -0.005 |  |
| Asian                  | 1,388                      | 1.3%  | 249                          | 0.8%  | 1,139                               | 1.5%  | 0.065  | 1.3%                       | 1.3%                         | 1.3%                                | -0.003 |  |
| Hispanic               | 1,783                      | 1.6%  | 349                          | 1.1%  | 1,434                               | 1.8%  | 0.062  | 1.6%                       | 1.6%                         | 1.6%                                | 0.001  |  |
| American Native        | 220                        | 0.2%  | 74                           | 0.2%  | 146                                 | 0.2%  | -0.010 | 0.2%                       | 0.2%                         | 0.2%                                | -0.001 |  |
| Unknown                | 1,388                      | 1.3%  | 268                          | 0.8%  | 1,120                               | 1.4%  | 0.056  | 1.2%                       | 1.2%                         | 1.3%                                | 0.005  |  |
| <b>ADI Group</b>       |                            |       |                              |       |                                     |       |        |                            |                              |                                     |        |  |
| Most advantaged        | 28,396                     | 25.7% | 6,708                        | 20.9% | 21,688                              | 27.7% | 0.159  | 25.6%                      | 25.5%                        | 25.7%                               | 0.003  |  |
| Slightly advantaged    | 35,104                     | 31.8% | 10,202                       | 31.7% | 24,902                              | 31.8% | 0.001  | 31.6%                      | 31.5%                        | 31.7%                               | 0.005  |  |
| Slightly disadvantaged | 34,361                     | 31.1% | 11,215                       | 34.9% | 23,146                              | 29.5% | -0.115 | 31.2%                      | 31.4%                        | 31.1%                               | -0.005 |  |
| Most disadvantaged     | 12,691                     | 11.5% | 4,038                        | 12.6% | 8,653                               | 11.0% | -0.047 | 11.5%                      | 11.6%                        | 11.5%                               | -0.004 |  |

|                                                    |        |       |        |       |        |       |        |       |       |       |        |  |
|----------------------------------------------------|--------|-------|--------|-------|--------|-------|--------|-------|-------|-------|--------|--|
| <b>Geography</b>                                   |        |       |        |       |        |       |        |       |       |       |        |  |
| Urban                                              | 93,187 | 84.3% | 26,029 | 80.9% | 67,158 | 85.7% | 0.127  | 84.2% | 84.1% | 84.3% | 0.004  |  |
| Rural                                              | 17,365 | 15.7% | 6,134  | 19.1% | 11,231 | 14.3% | -0.127 | 15.8% | 15.9% | 15.7% | -0.004 |  |
| <b>Frailty</b>                                     |        |       |        |       |        |       |        |       |       |       |        |  |
| Robust                                             | 35,777 | 32.4% | 11,859 | 36.9% | 23,918 | 30.5% | -0.135 | 32.4% | 32.6% | 32.4% | -0.004 |  |
| Prefrail                                           | 57,976 | 52.4% | 17,039 | 53.0% | 40,937 | 52.2% | -0.015 | 52.5% | 52.6% | 52.4% | -0.003 |  |
| Mildly frail                                       | 11,483 | 10.4% | 2,248  | 7.0%  | 9,235  | 11.8% | 0.165  | 10.3% | 10.2% | 10.4% | 0.007  |  |
| Moderately-to-severely frail                       | 5,316  | 4.8%  | 1,017  | 3.2%  | 4,299  | 5.5%  | 0.114  | 4.8%  | 4.7%  | 4.8%  | 0.004  |  |
| <b>Charlson Comorbidity Index Score</b>            |        |       |        |       |        |       |        |       |       |       |        |  |
| 0                                                  | 23,753 | 21.5% | 7,991  | 24.8% | 15,762 | 20.1% | -0.114 | 21.6% | 21.6% | 21.5% | -0.002 |  |
| 1                                                  | 23,664 | 21.4% | 7,230  | 22.5% | 16,434 | 21.0% | -0.037 | 21.5% | 21.6% | 21.4% | -0.004 |  |
| ≥2                                                 | 63,135 | 57.1% | 16,942 | 52.7% | 46,193 | 58.9% | 0.126  | 57.0% | 56.8% | 57.0% | 0.005  |  |
| <b>Operative indications for parathyroidectomy</b> |        |       |        |       |        |       |        |       |       |       |        |  |
| History of osteoporosis                            |        |       |        |       |        |       |        |       |       |       |        |  |
| No history                                         | 55,699 | 50.4% | 16,772 | 52.1% | 38,927 | 49.7% | -0.050 | 50.5% | 50.4% | 50.5% | -0.002 |  |
| History based on claim diagnosis                   | 27,180 | 24.6% | 7,696  | 23.9% | 19,484 | 24.9% | 0.022  | 24.6% | 24.2% | 24.7% | -0.014 |  |
| On pharmacologic treatment for osteoporosis        | 27,673 | 25.0% | 7,695  | 23.9% | 19,978 | 25.5% | 0.036  | 25.0% | 25.4% | 24.8% | 0.015  |  |
| History of kidney stones                           | 17,251 | 15.6% | 5,985  | 18.6% | 11,266 | 14.4% | -0.114 | 15.5% | 15.3% | 15.5% | 0.006  |  |
| History of stage 3 CKD                             | 11,568 | 10.5% | 2,420  | 7.5%  | 9,148  | 11.7% | 0.141  | 10.4% | 10.3% | 10.5% | 0.005  |  |
| <b>Endocrinologist care within 6</b>               | 51,523 | 46.6% | 18,367 | 57.1% | 33,156 | 42.3% | -0.299 | 46.7% | 47.0% | 46.6% | -0.007 |  |

|                                |        |       |       |       |        |       |        |       |       |       |        |
|--------------------------------|--------|-------|-------|-------|--------|-------|--------|-------|-------|-------|--------|
| <b>months of diagnosis</b>     |        |       |       |       |        |       |        |       |       |       |        |
| <b>Fracture Risk Factors</b>   |        |       |       |       |        |       |        |       |       |       |        |
| Prior fracture                 | 10,996 | 9.9%  | 2,535 | 7.9%  | 8,461  | 10.8% | 0.100  | 10.0% | 10.0% | 10.0% | -0.002 |
| Tobacco use                    | 5,305  | 4.8%  | 1,777 | 5.5%  | 3,528  | 4.5%  | -0.047 | 4.8%  | 4.8%  | 4.8%  | 0.002  |
| Alcohol abuse disorder         | 933    | 0.8%  | 223   | 0.7%  | 710    | 0.9%  | 0.024  | 0.9%  | 0.9%  | 0.8%  | -0.002 |
| Obesity                        | 14,396 | 13.0% | 4,343 | 13.5% | 10,053 | 12.8% | -0.020 | 13.0% | 12.9% | 13.0% | 0.004  |
| <b>Pharmacologic Treatment</b> |        |       |       |       |        |       |        |       |       |       |        |
| Chronic steroid use            | 1,408  | 1.3%  | 306   | 1.0%  | 1,102  | 1.4%  | 0.021  | 1.3%  | 1.3%  | 1.3%  | 0.000  |
| Cinacalcet                     | 2,757  | 2.5%  | 730   | 2.3%  | 2,027  | 2.6%  | 0.042  | 2.6%  | 2.6%  | 2.5%  | -0.008 |

<sup>a</sup> The propensity score used for inverse probability weighting in this table was based on all characteristics listed in this table.

Abbreviations: IPW, inverse probability weighted; ADI, area deprivation index; CKD, chronic kidney disease.

eTable 3. Unadjusted incidence rate and adjusted hazard of any fracture and hip fracture based on inverse-probability weighted Cox proportional hazard regression among subgroup of Medicare beneficiaries with PHPT who have continuous enrollment in Medicare Part D (prescription) coverage for 12 months prior to diagnosis.

| Characteristic           | Any Fracture                                                             |                                     |        |      | Hip Fracture                                                             |                                     |        |      |
|--------------------------|--------------------------------------------------------------------------|-------------------------------------|--------|------|--------------------------------------------------------------------------|-------------------------------------|--------|------|
|                          | Unadjusted incidence rate of any fracture<br>Rate (per 100 person-years) | Cox Proportional Hazards Regression |        |      | Unadjusted incidence rate of hip fracture<br>Rate (per 100 person-years) | Cox Proportional Hazards Regression |        |      |
|                          |                                                                          | IPW Adjusted HR                     | 95% CI |      |                                                                          | IPW Adjusted HR                     | 95% CI |      |
| <b>Treatment</b>         |                                                                          |                                     |        |      |                                                                          |                                     |        |      |
| Non-operative management | 3.18                                                                     | Ref                                 | --     | --   | 0.89                                                                     | Ref                                 | --     | --   |
| Parathyroidectomy        | 2.05                                                                     | 0.77                                | 0.74   | 0.80 | 0.51                                                                     | 0.73                                | 0.69   | 0.78 |
| <b>Sex</b>               |                                                                          |                                     |        |      |                                                                          |                                     |        |      |
| Male                     | 1.57                                                                     | Ref                                 | --     | --   | 0.47                                                                     | Ref                                 | --     | --   |
| Female                   | 3.12                                                                     | 1.44                                | 1.35   | 1.53 | 0.84                                                                     | 1.43                                | 1.28   | 1.61 |
| <b>Age group</b>         |                                                                          |                                     |        |      |                                                                          |                                     |        |      |
| 66 to 75                 | 1.80                                                                     | Ref                                 | --     | --   | 0.38                                                                     | Ref                                 | --     | --   |
| 76 to 85                 | 3.87                                                                     | 1.67                                | 1.60   | 1.74 | 1.14                                                                     | 2.47                                | 2.28   | 2.68 |
| 86 and above             | 6.57                                                                     | 2.49                                | 2.36   | 2.63 | 2.23                                                                     | 4.33                                | 3.91   | 4.80 |
| <b>Race</b>              |                                                                          |                                     |        |      |                                                                          |                                     |        |      |
| White                    | 3.01                                                                     | Ref                                 | --     | --   | 0.82                                                                     | Ref                                 | --     | --   |
| Black                    | 1.25                                                                     | 0.45                                | 0.41   | 0.50 | 0.41                                                                     | 0.50                                | 0.42   | 0.58 |
| Asian                    | 2.20                                                                     | 0.73                                | 0.62   | 0.87 | 0.59                                                                     | 0.73                                | 0.53   | 1.02 |
| Hispanic                 | 2.97                                                                     | 0.91                                | 0.80   | 1.04 | 0.79                                                                     | 0.80                                | 0.62   | 1.03 |
| American Native          | 3.30                                                                     | 1.38                                | 0.98   | 1.96 | 0.53                                                                     | 1.05                                | 0.51   | 2.14 |
| Unknown                  | 1.80                                                                     | 0.62                                | 0.51   | 0.77 | 0.51                                                                     | 0.74                                | 0.51   | 1.08 |
| <b>ADI Group</b>         |                                                                          |                                     |        |      |                                                                          |                                     |        |      |
| Most advantaged          | 2.83                                                                     | Ref                                 | --     | --   | 0.73                                                                     | Ref                                 | --     | --   |
| Slightly advantaged      | 2.83                                                                     | 1.05                                | 1.00   | 1.10 | 0.78                                                                     | 1.20                                | 1.10   | 1.32 |
| Slightly disadvantaged   | 2.85                                                                     | 1.05                                | 1.00   | 1.11 | 0.79                                                                     | 1.23                                | 1.12   | 1.35 |
| Most disadvantaged       | 2.76                                                                     | 1.13                                | 1.06   | 1.21 | 0.82                                                                     | 1.43                                | 1.27   | 1.62 |
| <b>Geography</b>         |                                                                          |                                     |        |      |                                                                          |                                     |        |      |
| Urban                    | 2.83                                                                     | Ref                                 | --     | --   | 0.77                                                                     | Ref                                 | --     | --   |
| Rural                    | 2.84                                                                     | 1.04                                | 0.99   | 1.09 | 0.78                                                                     | 0.97                                | 0.88   | 1.07 |



|                                                          |      |      |      |      |      |      |      |      |
|----------------------------------------------------------|------|------|------|------|------|------|------|------|
| <b>Frailty</b>                                           |      |      |      |      |      |      |      |      |
| Robust                                                   | 1.65 | Ref  | --   | --   | 0.43 | Ref  | --   | --   |
| Prefrail                                                 | 3.02 | 1.42 | 1.36 | 1.50 | 0.83 | 1.44 | 1.32 | 1.58 |
| Mildly frail                                             | 5.30 | 2.05 | 1.92 | 2.19 | 1.49 | 2.27 | 2.01 | 2.56 |
| Moderately-to-severely frail                             | 5.38 | 1.85 | 1.70 | 2.01 | 1.44 | 1.83 | 1.57 | 2.14 |
| <b>Charlson Comorbidity Index Score</b>                  |      |      |      |      |      |      |      |      |
| 0                                                        | 2.10 | Ref  | --   | --   | 0.59 | Ref  | --   | --   |
| 1                                                        | 2.66 | 1.09 | 1.03 | 1.16 | 0.74 | 1.06 | 0.95 | 1.19 |
| ≥2                                                       | 3.20 | 1.14 | 1.08 | 1.20 | 0.86 | 1.05 | 0.95 | 1.16 |
| <b>Operative indications for parathyroidectomy</b>       |      |      |      |      |      |      |      |      |
| History of osteoporosis                                  |      |      |      |      |      |      |      |      |
| No osteoporosis                                          | 1.66 | Ref  | --   | --   | 0.51 | Ref  | --   | --   |
| Diagnosis code only                                      | 3.89 | 1.55 | 1.48 | 1.63 | 1.09 | 1.38 | 1.27 | 1.50 |
| On pharmacologic treatment for osteoporosis              | 4.11 | 1.68 | 1.61 | 1.76 | 0.97 | 1.19 | 1.09 | 1.30 |
| History of kidney stones                                 | 2.73 | 0.97 | 0.92 | 1.02 | 0.70 | 0.92 | 0.84 | 1.02 |
| History of stage 3 CKD                                   | 3.04 | 0.95 | 0.89 | 1.01 | 0.92 | 1.17 | 1.05 | 1.30 |
| <b>Endocrinologist care within 6 months of diagnosis</b> |      |      |      |      |      |      |      |      |
|                                                          | 2.77 | 0.98 | 0.94 | 1.01 | 0.72 | 0.94 | 0.87 | 1.00 |
| <b>Fracture Risk Factors</b>                             |      |      |      |      |      |      |      |      |
| Prior fracture                                           | 8.82 | 2.36 | 2.26 | 2.46 | 1.83 | 1.67 | 1.53 | 1.82 |
| Tobacco use                                              | 3.63 | 1.43 | 1.32 | 1.55 | 1.07 | 1.70 | 1.47 | 1.97 |
| Alcohol use disorder                                     | 4.95 | 1.44 | 1.20 | 1.72 | 1.39 | 1.51 | 1.08 | 2.12 |
| Obesity                                                  | 2.36 | 0.99 | 0.93 | 1.05 | 0.46 | 0.74 | 0.64 | 0.84 |
| <b>Pharmacologic Treatment</b>                           |      |      |      |      |      |      |      |      |
| Chronic steroid use                                      | 6.19 | 1.70 | 1.51 | 1.92 | 1.03 | 1.25 | 0.97 | 1.62 |
| Cinacalcet                                               | 3.66 | 0.90 | 0.81 | 1.01 | 1.21 | 1.03 | 0.86 | 1.25 |

\* The propensity score used for inverse probability weighting in this table was based on all characteristics listed in this table.

Abbreviations: IPW, inverse probability weighted; ADI, area deprivation index; CKD, chronic kidney disease.
